# Supplementary material for: Molecular detection of two major gastrointestinal parasite genera in cattle using a novel droplet digital PCR approach
Source: PubMed Central journal article supplement (PMC6754349; doi:10.1007/s00436-019-06414-7), 2019-08-06

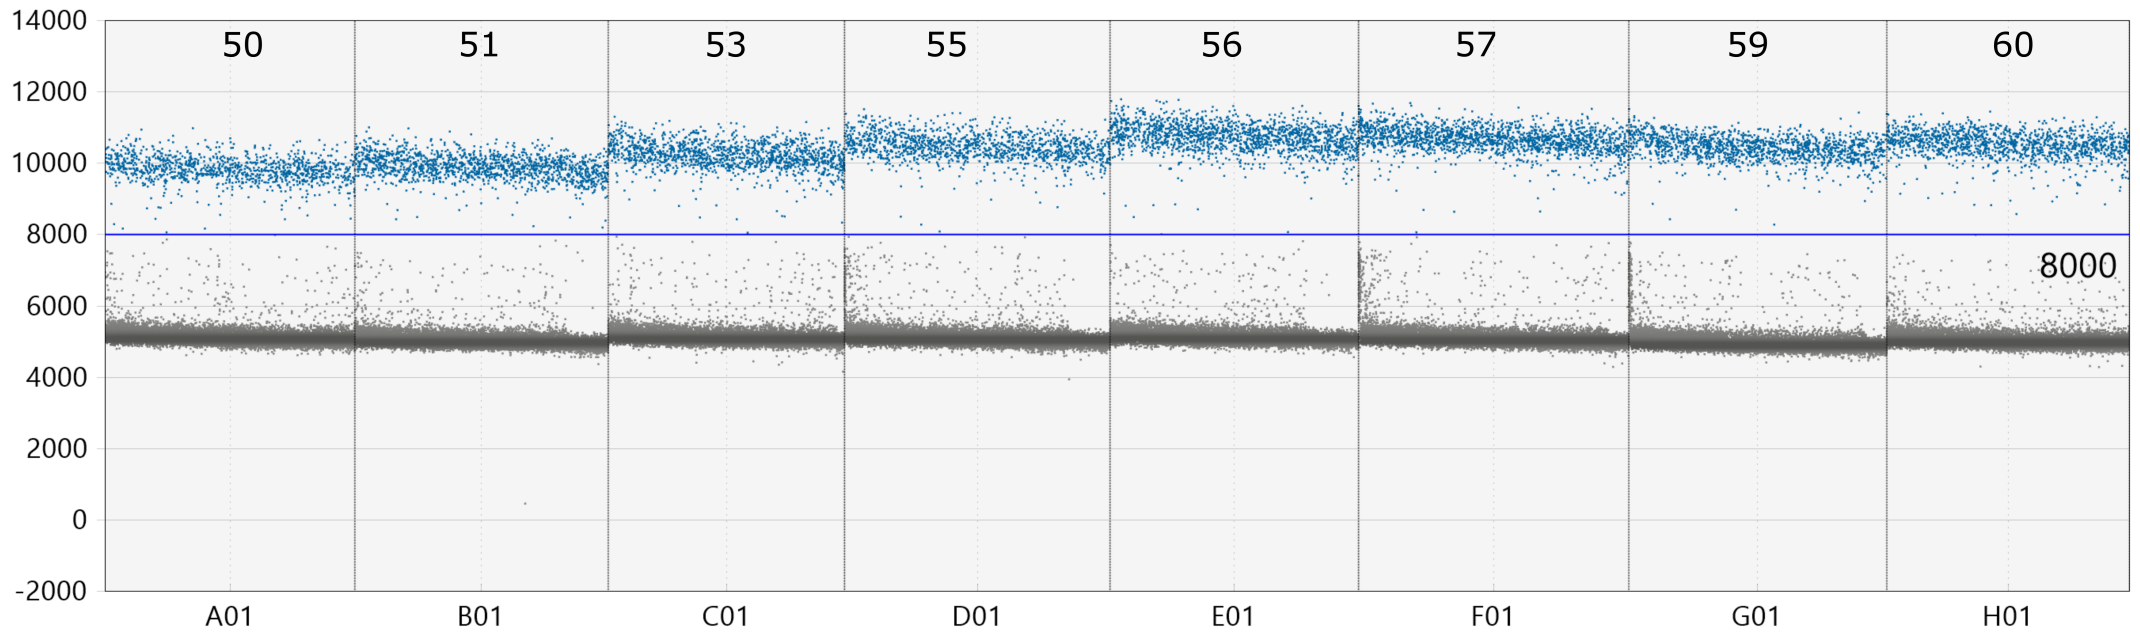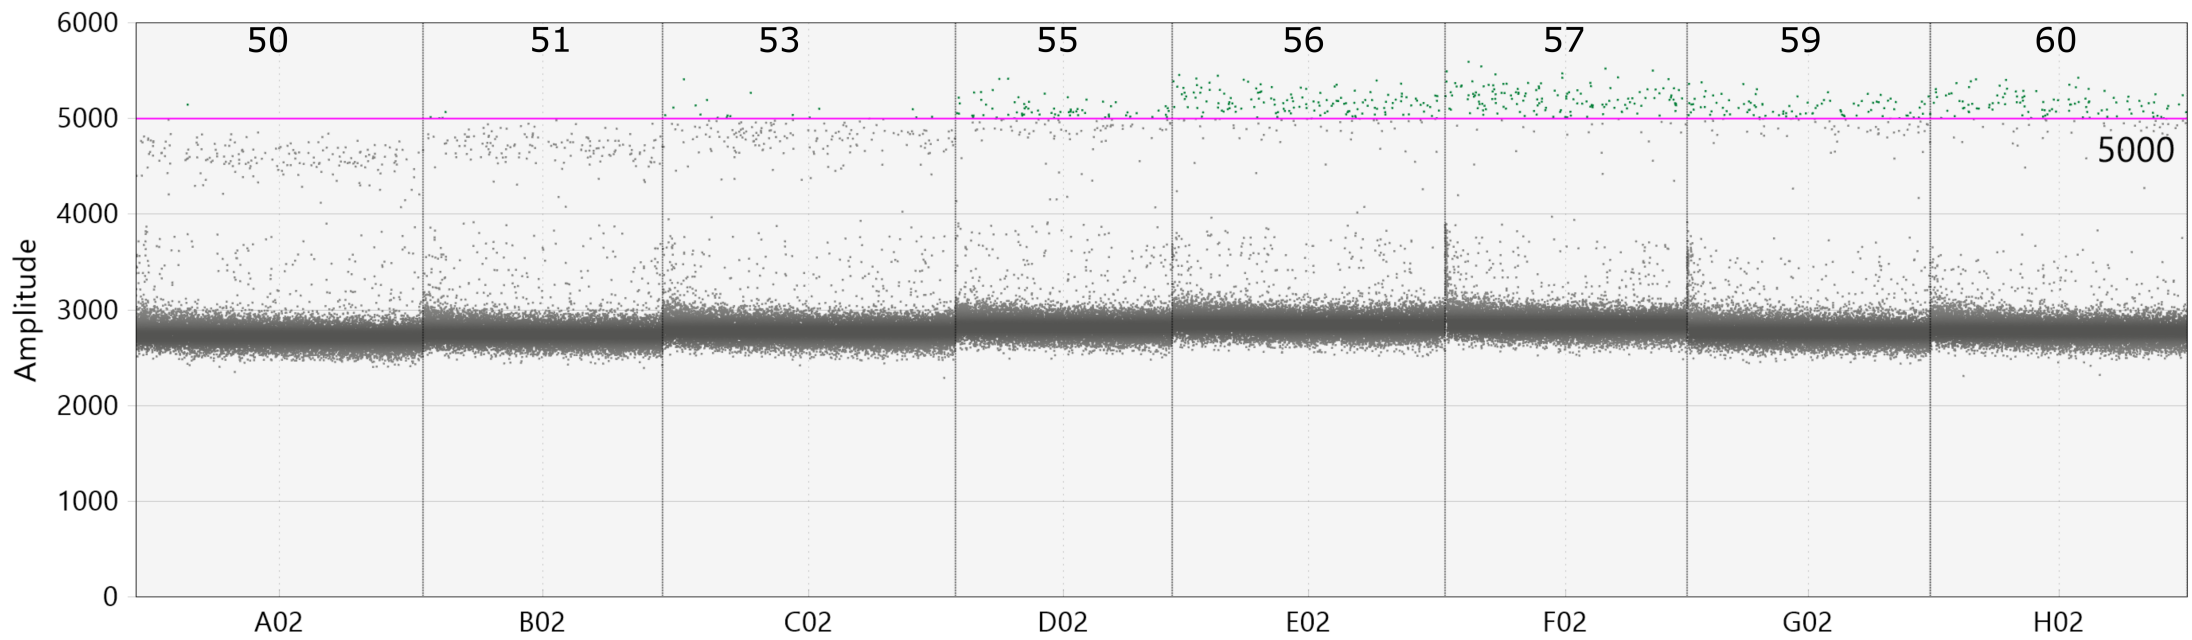

Supplement: 436_2019_6414_MOESM1_ESM.pdf [file 436_2019_6414_MOESM1_ESM.pdf]
